# Supplementary material
Source: MDPI journal article supplement (https://www.mdpi.com/2075-163X/12/12/1531)
Supplement: s1 [file s1]

**Table S1.** Zircon LA-ICP-MS U-Pb data of the rocks from the Lushan area

| Spot                                       | Concentrations (ppm) |        |       | Th/U | Isotope ratios                       |        |                                     |        |                                     |        | Apparent age (Ma)                    |     |                                     |    |                                     |    | Concordance |
|--------------------------------------------|----------------------|--------|-------|------|--------------------------------------|--------|-------------------------------------|--------|-------------------------------------|--------|--------------------------------------|-----|-------------------------------------|----|-------------------------------------|----|-------------|
|                                            | Th                   | U      | Pb    |      | <sup>207</sup> Pb/ <sup>206</sup> Pb | 1σ     | <sup>207</sup> Pb/ <sup>235</sup> U | 1σ     | <sup>206</sup> Pb/ <sup>238</sup> U | 1σ     | <sup>207</sup> Pb/ <sup>206</sup> Pb | 1σ  | <sup>207</sup> Pb/ <sup>235</sup> U | 1σ | <sup>206</sup> Pb/ <sup>238</sup> U | 1σ | (%)         |
| LS26-2 Rim (116°01'01.14"E, 29°26'54.12"N) |                      |        |       |      |                                      |        |                                     |        |                                     |        |                                      |     |                                     |    |                                     |    |             |
| 1                                          | 191.4                | 3213.8 | 86.7  | 0.06 | 0.0480                               | 0.0015 | 0.1627                              | 0.0062 | 0.0250                              | 0.0008 | 98                                   | 69  | 153                                 | 5  | 159                                 | 5  | 95          |
| 2                                          | 572.4                | 2927.9 | 79.9  | 0.20 | 0.0602                               | 0.0022 | 0.2069                              | 0.0081 | 0.0251                              | 0.0008 | 609                                  | 80  | 191                                 | 7  | 160                                 | 5  | 82          |
| 3                                          | 1172.9               | 9205.7 | 259.7 | 0.13 | 0.0553                               | 0.0031 | 0.1928                              | 0.0092 | 0.0253                              | 0.0008 | 426                                  | 129 | 179                                 | 8  | 161                                 | 5  | 78          |
| 4                                          | 406.8                | 6469.0 | 189.3 | 0.06 | 0.0513                               | 0.0026 | 0.1732                              | 0.0074 | 0.0245                              | 0.0007 | 253                                  | 119 | 162                                 | 6  | 156                                 | 4  | 89          |
| 5                                          | 143.9                | 4289.1 | 116.7 | 0.03 | 0.0490                               | 0.0014 | 0.1682                              | 0.0062 | 0.0247                              | 0.0007 | 150                                  | 67  | 158                                 | 5  | 158                                 | 4  | 99          |
| 6                                          | 367.5                | 5088.3 | 135.3 | 0.07 | 0.0486                               | 0.0014 | 0.1655                              | 0.0062 | 0.0249                              | 0.0008 | 128                                  | 69  | 155                                 | 5  | 158                                 | 5  | 98          |
| 7                                          | 202.4                | 4664.1 | 125.6 | 0.04 | 0.0521                               | 0.0027 | 0.1735                              | 0.0074 | 0.0242                              | 0.0007 | 290                                  | 119 | 162                                 | 6  | 154                                 | 4  | 85          |
| 8                                          | 405.0                | 4621.7 | 125.3 | 0.09 | 0.0558                               | 0.0016 | 0.1969                              | 0.0073 | 0.0255                              | 0.0007 | 456                                  | 60  | 183                                 | 6  | 162                                 | 4  | 83          |
| 9                                          | 181.7                | 5251.2 | 138.7 | 0.03 | 0.0516                               | 0.0018 | 0.1740                              | 0.0072 | 0.0256                              | 0.0011 | 265                                  | 78  | 163                                 | 6  | 163                                 | 7  | 99          |
| 10                                         | 141.1                | 2407.6 | 72.4  | 0.06 | 0.0509                               | 0.0027 | 0.1867                              | 0.0078 | 0.0266                              | 0.0009 | 238                                  | 125 | 174                                 | 7  | 169                                 | 6  | 92          |
| 11                                         | 243.9                | 3532.9 | 96.0  | 0.07 | 0.0510                               | 0.0015 | 0.1810                              | 0.0069 | 0.0260                              | 0.0009 | 239                                  | 69  | 169                                 | 6  | 166                                 | 6  | 98          |
| 12                                         | 197.1                | 5603.3 | 145.2 | 0.04 | 0.0538                               | 0.0021 | 0.1846                              | 0.0081 | 0.0255                              | 0.0011 | 365                                  | 87  | 172                                 | 7  | 162                                 | 7  | 94          |
| 13                                         | 217.7                | 4811.0 | 133.1 | 0.05 | 0.0502                               | 0.0030 | 0.1669                              | 0.0088 | 0.0241                              | 0.0006 | 203                                  | 136 | 157                                 | 8  | 154                                 | 4  | 70          |
| 14                                         | 132.0                | 3772.8 | 106.6 | 0.03 | 0.0502                               | 0.0015 | 0.1793                              | 0.0067 | 0.0259                              | 0.0008 | 211                                  | 101 | 167                                 | 6  | 165                                 | 5  | 98          |
| 15                                         | 236.2                | 5208.3 | 140.3 | 0.05 | 0.0512                               | 0.0025 | 0.1830                              | 0.0072 | 0.0259                              | 0.0007 | 248                                  | 113 | 171                                 | 6  | 165                                 | 4  | 91          |
| 16                                         | 193.2                | 3190.4 | 96.3  | 0.06 | 0.0523                               | 0.0028 | 0.1913                              | 0.0088 | 0.0265                              | 0.0007 | 298                                  | 125 | 178                                 | 7  | 169                                 | 5  | 76          |
| 17                                         | 155.9                | 4006.5 | 114.5 | 0.04 | 0.0510                               | 0.0015 | 0.1880                              | 0.0081 | 0.0271                              | 0.0012 | 239                                  | 69  | 175                                 | 7  | 172                                 | 8  | 91          |
| 18                                         | 115.4                | 1940.6 | 56.0  | 0.06 | 0.0504                               | 0.0017 | 0.1835                              | 0.0077 | 0.0265                              | 0.0009 | 213                                  | 78  | 171                                 | 7  | 168                                 | 6  | 95          |
| 19                                         | 129.1                | 3050.5 | 81.5  | 0.04 | 0.0516                               | 0.0015 | 0.1827                              | 0.0065 | 0.0256                              | 0.0007 | 333                                  | 60  | 170                                 | 6  | 163                                 | 4  | 95          |
| 20                                         | 160.6                | 5270.0 | 139.1 | 0.03 | 0.0478                               | 0.0014 | 0.1775                              | 0.0072 | 0.0268                              | 0.0009 | 100                                  | 73  | 166                                 | 6  | 171                                 | 6  | 97          |
| 21                                         | 131.7                | 2143.4 | 62.4  | 0.06 | 0.0532                               | 0.0026 | 0.1979                              | 0.0076 | 0.0270                              | 0.0008 | 338                                  | 113 | 183                                 | 6  | 172                                 | 5  | 98          |
| 22                                         | 200.1                | 4231.8 | 114.9 | 0.05 | 0.0524                               | 0.0029 | 0.1924                              | 0.0080 | 0.0266                              | 0.0010 | 302                                  | 129 | 179                                 | 7  | 170                                 | 6  | 91          |

|    |       |        |       |      |        |        |        |        |        |        |     |     |     |   |     |   |    |
|----|-------|--------|-------|------|--------|--------|--------|--------|--------|--------|-----|-----|-----|---|-----|---|----|
| 23 | 249.2 | 4222.3 | 115.7 | 0.06 | 0.0543 | 0.0036 | 0.1910 | 0.0099 | 0.0255 | 0.0010 | 382 | 151 | 177 | 8 | 162 | 6 | 88 |
| 24 | 259.6 | 4177.2 | 114.9 | 0.06 | 0.0561 | 0.0022 | 0.2018 | 0.0099 | 0.0263 | 0.0009 | 457 | 85  | 187 | 8 | 167 | 6 | 88 |
| 25 | 292.1 | 4587.5 | 145.9 | 0.06 | 0.0516 | 0.0029 | 0.1726 | 0.0086 | 0.0243 | 0.0007 | 266 | 133 | 162 | 7 | 155 | 4 | 74 |
| 26 | 107.9 | 2745.5 | 75.3  | 0.04 | 0.0501 | 0.0014 | 0.1766 | 0.0062 | 0.0254 | 0.0007 | 198 | 67  | 165 | 5 | 161 | 5 | 97 |
| 27 | 38.1  | 2384.2 | 69.1  | 0.02 | 0.0495 | 0.0015 | 0.1787 | 0.0062 | 0.0263 | 0.0008 | 172 | 72  | 167 | 5 | 167 | 5 | 99 |
| 28 | 392.4 | 8932.7 | 249.2 | 0.04 | 0.0490 | 0.0023 | 0.1778 | 0.0067 | 0.0263 | 0.0007 | 146 | 107 | 166 | 6 | 168 | 4 | 87 |
| 29 | 192.6 | 3984.7 | 113.9 | 0.05 | 0.0528 | 0.0027 | 0.1920 | 0.0081 | 0.0264 | 0.0007 | 321 | 118 | 178 | 7 | 168 | 5 | 98 |

LS26-2 Core

|   |       |        |       |      |        |        |        |        |        |        |     |     |     |    |     |    |    |
|---|-------|--------|-------|------|--------|--------|--------|--------|--------|--------|-----|-----|-----|----|-----|----|----|
| 1 | 175.0 | 2619.1 | 78.6  | 0.07 | 0.0515 | 0.0028 | 0.1962 | 0.0082 | 0.0277 | 0.0010 | 261 | 127 | 182 | 7  | 176 | 6  | 95 |
| 2 | 382.2 | 3850.0 | 115.6 | 0.10 | 0.0514 | 0.0017 | 0.1963 | 0.0076 | 0.0278 | 0.0009 | 257 | 74  | 182 | 6  | 177 | 6  | 97 |
| 3 | 275.3 | 3251.2 | 105.5 | 0.08 | 0.0578 | 0.0030 | 0.2303 | 0.0097 | 0.0289 | 0.0009 | 522 | 118 | 210 | 8  | 184 | 6  | 83 |
| 4 | 340.5 | 5809.6 | 167.4 | 0.06 | 0.0642 | 0.0029 | 0.2350 | 0.0125 | 0.0293 | 0.0017 | 750 | 95  | 214 | 10 | 186 | 11 | 85 |
| 5 | 767.3 | 9132.9 | 336.3 | 0.08 | 0.0579 | 0.0051 | 0.2225 | 0.0178 | 0.0279 | 0.0010 | 524 | 199 | 204 | 15 | 177 | 6  | 64 |
| 6 | 127.1 | 3111.5 | 91.8  | 0.04 | 0.0524 | 0.0017 | 0.2009 | 0.0085 | 0.0279 | 0.0010 | 302 | 72  | 186 | 7  | 177 | 6  | 95 |
| 7 | 86.9  | 4111.3 | 111.6 | 0.02 | 0.0502 | 0.0015 | 0.1937 | 0.0073 | 0.0281 | 0.0010 | 211 | 70  | 180 | 6  | 179 | 6  | 99 |
| 8 | 169.2 | 4366.1 | 138.5 | 0.04 | 0.0500 | 0.0043 | 0.2109 | 0.0130 | 0.0306 | 0.0018 | 195 | 193 | 194 | 11 | 194 | 11 | 82 |

LS26-3 (116°01'01.14"E, 29°26'54.12"N)

|   |       |        |      |      |        |        |        |        |        |        |     |     |     |    |     |   |    |
|---|-------|--------|------|------|--------|--------|--------|--------|--------|--------|-----|-----|-----|----|-----|---|----|
| 1 | 284.2 | 2432.6 | 58.6 | 0.12 | 0.0536 | 0.0033 | 0.1652 | 0.0098 | 0.0218 | 0.0007 | 355 | 81  | 155 | 9  | 139 | 4 | 88 |
| 2 | 402.7 | 982.3  | 25.7 | 0.41 | 0.0495 | 0.0024 | 0.1504 | 0.0072 | 0.0221 | 0.0006 | 170 | 62  | 142 | 6  | 141 | 4 | 98 |
| 3 | 414.3 | 2469.6 | 61.0 | 0.17 | 0.0568 | 0.0037 | 0.1769 | 0.0115 | 0.0225 | 0.0007 | 483 | 89  | 165 | 10 | 143 | 4 | 85 |
| 4 | 73.6  | 2872.3 | 64.8 | 0.03 | 0.0545 | 0.0057 | 0.1567 | 0.0153 | 0.0209 | 0.0008 | 392 | 240 | 148 | 13 | 133 | 5 | 83 |
| 5 | 109.5 | 2547.6 | 58.9 | 0.04 | 0.0506 | 0.0022 | 0.1507 | 0.0064 | 0.0215 | 0.0006 | 221 | 52  | 143 | 6  | 137 | 4 | 96 |
| 6 | 79.7  | 2245.3 | 49.4 | 0.04 | 0.0520 | 0.0033 | 0.1467 | 0.0082 | 0.0205 | 0.0006 | 284 | 146 | 139 | 7  | 131 | 4 | 91 |
| 7 | 121.7 | 3301.8 | 73.1 | 0.04 | 0.0509 | 0.0035 | 0.1463 | 0.0097 | 0.0208 | 0.0007 | 237 | 95  | 139 | 9  | 133 | 4 | 95 |
| 8 | 472.0 | 3279.2 | 75.9 | 0.14 | 0.0485 | 0.0027 | 0.1431 | 0.0069 | 0.0214 | 0.0006 | 124 | 126 | 136 | 6  | 136 | 4 | 95 |
| 9 | 55.7  | 2279.6 | 51.7 | 0.02 | 0.0499 | 0.0022 | 0.1497 | 0.0064 | 0.0215 | 0.0006 | 190 | 51  | 142 | 6  | 137 | 4 | 96 |

|    |       |        |       |      |        |        |        |        |        |        |      |     |     |     |     |    |    |
|----|-------|--------|-------|------|--------|--------|--------|--------|--------|--------|------|-----|-----|-----|-----|----|----|
| 10 | 342.2 | 4409.3 | 101.7 | 0.08 | 0.0547 | 0.0028 | 0.1580 | 0.0070 | 0.0209 | 0.0006 | 401  | 119 | 149 | 6   | 134 | 4  | 83 |
| 11 | 130.4 | 3020.5 | 68.9  | 0.04 | 0.0512 | 0.0037 | 0.1504 | 0.0106 | 0.0213 | 0.0007 | 248  | 103 | 142 | 9   | 136 | 4  | 94 |
| 12 | 132.6 | 2071.5 | 45.9  | 0.06 | 0.0496 | 0.0024 | 0.1414 | 0.0068 | 0.0206 | 0.0006 | 175  | 62  | 134 | 6   | 132 | 4  | 98 |
| 13 | 66.4  | 2996.9 | 67.0  | 0.02 | 0.0479 | 0.0024 | 0.1402 | 0.0058 | 0.0213 | 0.0006 | 92   | 110 | 133 | 5   | 136 | 4  | 95 |
| 14 | 652.0 | 2271.8 | 74.9  | 0.29 | 0.0539 | 0.0036 | 0.2152 | 0.0129 | 0.0290 | 0.0008 | 367  | 154 | 198 | 11  | 184 | 5  | 83 |
| 15 | 175.3 | 295.1  | 47.3  | 0.59 | 0.0856 | 0.0195 | 1.4772 | 0.3403 | 0.1225 | 0.0115 | 1329 | 313 | 921 | 139 | 745 | 66 | 78 |

NS-7 Rim (116°00'58.89"E, 29°26'58.06"N)

|    |       |        |       |      |        |        |        |        |        |        |       |     |     |   |     |   |    |
|----|-------|--------|-------|------|--------|--------|--------|--------|--------|--------|-------|-----|-----|---|-----|---|----|
| 1  | 88.6  | 4248.2 | 97.0  | 0.02 | 0.0491 | 0.0021 | 0.1473 | 0.0064 | 0.0216 | 0.0006 | 154   | 102 | 140 | 6 | 138 | 4 | 98 |
| 2  | 45.4  | 4241.3 | 94.4  | 0.01 | 0.0481 | 0.0021 | 0.1441 | 0.0062 | 0.0216 | 0.0006 | 106   | -94 | 137 | 5 | 138 | 4 | 99 |
| 3  | 117.3 | 6426.0 | 143.4 | 0.02 | 0.0520 | 0.0021 | 0.1512 | 0.0062 | 0.0208 | 0.0006 | 283   | 94  | 143 | 5 | 133 | 4 | 92 |
| 4  | 36.4  | 3640.2 | 81.9  | 0.01 | 0.0492 | 0.0021 | 0.1448 | 0.0062 | 0.0213 | 0.0006 | 167   | 100 | 137 | 6 | 136 | 4 | 98 |
| 5  | 196.6 | 7747.4 | 128.2 | 0.03 | 0.0549 | 0.0024 | 0.1171 | 0.0050 | 0.0153 | 0.0004 | 409   | 98  | 112 | 5 | 98  | 3 | 86 |
| 6  | 74.8  | 3898.4 | 87.8  | 0.02 | 0.0525 | 0.0022 | 0.1594 | 0.0068 | 0.0218 | 0.0006 | 309   | 129 | 150 | 6 | 139 | 4 | 92 |
| 7  | 61.1  | 3493.4 | 80.4  | 0.02 | 0.0511 | 0.0023 | 0.1551 | 0.0069 | 0.0218 | 0.0006 | 256   | 73  | 146 | 6 | 139 | 4 | 94 |
| 8  | 73.7  | 4792.0 | 109.2 | 0.02 | 0.0457 | 0.0018 | 0.1391 | 0.0054 | 0.0218 | 0.0006 | error |     | 132 | 5 | 139 | 4 | 95 |
| 9  | 31.9  | 2716.4 | 60.8  | 0.01 | 0.0549 | 0.0029 | 0.1554 | 0.0075 | 0.0205 | 0.0006 | 409   | 117 | 147 | 7 | 131 | 4 | 88 |
| 10 | 45.4  | 4358.8 | 100.6 | 0.01 | 0.0474 | 0.0021 | 0.1427 | 0.0061 | 0.0216 | 0.0006 | 78    | 91  | 135 | 5 | 138 | 4 | 98 |
| 11 | 61.5  | 3795.9 | 84.8  | 0.02 | 0.0496 | 0.0020 | 0.1477 | 0.0059 | 0.0215 | 0.0006 | 176   | 127 | 140 | 5 | 137 | 4 | 98 |
| 12 | 35.4  | 3751.0 | 84.8  | 0.01 | 0.0498 | 0.0021 | 0.1499 | 0.0063 | 0.0216 | 0.0006 | 187   | 98  | 142 | 6 | 137 | 4 | 96 |
| 13 | 38.4  | 4146.7 | 94.0  | 0.01 | 0.0486 | 0.0020 | 0.1448 | 0.0059 | 0.0214 | 0.0006 | 128   | 94  | 137 | 5 | 137 | 4 | 99 |
| 14 | 33.9  | 3468.2 | 78.9  | 0.01 | 0.0497 | 0.0022 | 0.1489 | 0.0068 | 0.0217 | 0.0006 | 189   | 102 | 141 | 6 | 138 | 4 | 98 |
| 15 | 33.2  | 3857.1 | 88.3  | 0.01 | 0.0492 | 0.0022 | 0.1467 | 0.0067 | 0.0217 | 0.0006 | 167   | 101 | 139 | 6 | 138 | 4 | 99 |
| 16 | 38.1  | 3430.9 | 77.4  | 0.01 | 0.0496 | 0.0021 | 0.1508 | 0.0062 | 0.0219 | 0.0006 | 176   | 98  | 143 | 5 | 140 | 4 | 97 |
| 17 | 36.2  | 3509.8 | 80.1  | 0.01 | 0.0463 | 0.0019 | 0.1414 | 0.0060 | 0.0220 | 0.0006 | 13    | 96  | 134 | 5 | 140 | 4 | 95 |
| 18 | 107.5 | 7081.5 | 163.7 | 0.02 | 0.0493 | 0.0022 | 0.1499 | 0.0069 | 0.0220 | 0.0006 | 165   | 102 | 142 | 6 | 140 | 4 | 99 |
| 19 | 99.2  | 4225.9 | 101.3 | 0.02 | 0.0545 | 0.0024 | 0.1689 | 0.0074 | 0.0225 | 0.0007 | 394   | 94  | 158 | 6 | 143 | 4 | 89 |

|    |        |         |       |      |        |        |        |        |        |        |     |     |     |   |     |   |    |
|----|--------|---------|-------|------|--------|--------|--------|--------|--------|--------|-----|-----|-----|---|-----|---|----|
| 20 | 62.3   | 4516.9  | 105.2 | 0.01 | 0.0486 | 0.0021 | 0.1500 | 0.0063 | 0.0222 | 0.0006 | 128 | 97  | 142 | 6 | 141 | 4 | 99 |
| 21 | 53.6   | 4047.2  | 93.6  | 0.01 | 0.0496 | 0.0022 | 0.1549 | 0.0068 | 0.0224 | 0.0006 | 189 | 102 | 146 | 6 | 143 | 4 | 97 |
| 22 | 112.4  | 4568.1  | 107.2 | 0.02 | 0.0502 | 0.0022 | 0.1566 | 0.0068 | 0.0224 | 0.0007 | 211 | 100 | 148 | 6 | 143 | 4 | 96 |
| 23 | 52.8   | 4279.6  | 98.6  | 0.01 | 0.0467 | 0.0020 | 0.1439 | 0.0060 | 0.0221 | 0.0006 | 32  | 100 | 136 | 5 | 141 | 4 | 96 |
| 24 | 37.6   | 4094.7  | 95.1  | 0.01 | 0.0484 | 0.0021 | 0.1523 | 0.0065 | 0.0226 | 0.0006 | 117 | 102 | 144 | 6 | 144 | 4 | 99 |
| 25 | 66.9   | 5188.2  | 122.6 | 0.01 | 0.0475 | 0.0021 | 0.1532 | 0.0069 | 0.0231 | 0.0007 | 76  | 113 | 145 | 6 | 147 | 4 | 98 |
| 26 | 54.2   | 4387.1  | 102.9 | 0.01 | 0.0505 | 0.0022 | 0.1566 | 0.0069 | 0.0222 | 0.0006 | 220 | 97  | 148 | 6 | 142 | 4 | 95 |
| 27 | 88.2   | 3857.3  | 91.2  | 0.02 | 0.0511 | 0.0021 | 0.1601 | 0.0067 | 0.0223 | 0.0006 | 256 | 96  | 151 | 6 | 142 | 4 | 94 |
| 28 | 38.7   | 3636.0  | 85.4  | 0.01 | 0.0504 | 0.0021 | 0.1568 | 0.0066 | 0.0223 | 0.0006 | 213 | 92  | 148 | 6 | 142 | 4 | 96 |
| 29 | 51.2   | 4224.2  | 99.6  | 0.01 | 0.0509 | 0.0022 | 0.1566 | 0.0067 | 0.0221 | 0.0006 | 235 | 100 | 148 | 6 | 141 | 4 | 95 |
| 30 | 2057.3 | 15237.5 | 355.9 | 0.14 | 0.0509 | 0.0021 | 0.1564 | 0.0066 | 0.0221 | 0.0007 | 235 | 62  | 148 | 6 | 141 | 4 | 95 |
| 31 | 43.1   | 3643.9  | 83.5  | 0.01 | 0.0510 | 0.0023 | 0.1557 | 0.0068 | 0.0221 | 0.0006 | 239 | 104 | 147 | 6 | 141 | 4 | 95 |
| 32 | 41.2   | 3650.9  | 84.1  | 0.01 | 0.0491 | 0.0022 | 0.1497 | 0.0064 | 0.0221 | 0.0006 | 154 | 106 | 142 | 6 | 141 | 4 | 99 |
| 33 | 181.1  | 9191.4  | 217.1 | 0.02 | 0.0527 | 0.0022 | 0.1640 | 0.0067 | 0.0222 | 0.0006 | 322 | 96  | 154 | 6 | 142 | 4 | 91 |

---

NS-7 Core

|   |        |         |       |      |        |        |        |        |        |        |     |     |     |    |     |    |    |
|---|--------|---------|-------|------|--------|--------|--------|--------|--------|--------|-----|-----|-----|----|-----|----|----|
| 1 | 208.5  | 4276.4  | 108.7 | 0.05 | 0.0550 | 0.0024 | 0.1821 | 0.0077 | 0.0236 | 0.0007 | 413 | 94  | 170 | 7  | 150 | 4  | 87 |
| 2 | 393.4  | 3222.1  | 103.5 | 0.12 | 0.0568 | 0.0026 | 0.2294 | 0.0108 | 0.0291 | 0.0009 | 483 | 97  | 210 | 9  | 185 | 6  | 87 |
| 3 | 302.7  | 3717.6  | 104.3 | 0.08 | 0.0489 | 0.0022 | 0.1748 | 0.0083 | 0.0262 | 0.0009 | 146 | 110 | 164 | 7  | 167 | 6  | 98 |
| 4 | 58.7   | 4642.4  | 123.2 | 0.01 | 0.0546 | 0.0027 | 0.1853 | 0.0091 | 0.0243 | 0.0007 | 398 | 113 | 173 | 8  | 155 | 5  | 89 |
| 5 | 188.5  | 6018.5  | 166.1 | 0.03 | 0.0505 | 0.0023 | 0.1708 | 0.0079 | 0.0247 | 0.0008 | 217 | 107 | 160 | 7  | 157 | 5  | 98 |
| 6 | 187.9  | 4268.5  | 111.1 | 0.04 | 0.0475 | 0.0023 | 0.1600 | 0.0079 | 0.0243 | 0.0007 | 76  | 107 | 151 | 7  | 155 | 5  | 97 |
| 7 | 72.1   | 3782.5  | 97.7  | 0.02 | 0.0576 | 0.0027 | 0.1876 | 0.0086 | 0.0235 | 0.0007 | 517 | 100 | 175 | 7  | 150 | 4  | 84 |
| 8 | 57.5   | 3016.3  | 69.3  | 0.02 | 0.0508 | 0.0023 | 0.1547 | 0.0068 | 0.0222 | 0.0007 | 232 | 104 | 146 | 6  | 141 | 4  | 96 |
| 9 | 2101.8 | 28002.1 | 668.0 | 0.08 | 0.0501 | 0.0021 | 0.1738 | 0.0118 | 0.0255 | 0.0017 | 198 | 100 | 163 | 10 | 162 | 10 | 99 |

---

NS-17 Rim (116°00'58.89"E, 29°26'58.06"N)

|   |       |        |      |      |        |        |        |        |        |        |     |     |     |   |     |   |    |
|---|-------|--------|------|------|--------|--------|--------|--------|--------|--------|-----|-----|-----|---|-----|---|----|
| 1 | 195.0 | 2353.0 | 53.5 | 0.08 | 0.0499 | 0.0023 | 0.1443 | 0.0066 | 0.0210 | 0.0006 | 191 | 106 | 137 | 6 | 134 | 4 | 98 |
|---|-------|--------|------|------|--------|--------|--------|--------|--------|--------|-----|-----|-----|---|-----|---|----|

|    |       |        |       |      |        |        |        |        |        |        |       |     |     |   |     |   |    |
|----|-------|--------|-------|------|--------|--------|--------|--------|--------|--------|-------|-----|-----|---|-----|---|----|
| 2  | 177.4 | 4449.1 | 102.4 | 0.04 | 0.0536 | 0.0022 | 0.1566 | 0.0067 | 0.0211 | 0.0006 | 367   | 97  | 148 | 6 | 134 | 4 | 90 |
| 3  | 332.7 | 3520.8 | 76.2  | 0.09 | 0.0532 | 0.0026 | 0.1469 | 0.0069 | 0.0205 | 0.0006 | 345   | 111 | 139 | 6 | 131 | 4 | 93 |
| 4  | 87.9  | 3215.7 | 71.2  | 0.03 | 0.0452 | 0.0020 | 0.1298 | 0.0056 | 0.0206 | 0.0006 | error |     | 124 | 5 | 132 | 4 | 93 |
| 5  | 92.1  | 2855.7 | 64.3  | 0.03 | 0.0488 | 0.0021 | 0.1416 | 0.0063 | 0.0208 | 0.0006 | 139   | 102 | 135 | 6 | 133 | 4 | 98 |
| 6  | 56.5  | 2231.6 | 49.9  | 0.03 | 0.0487 | 0.0024 | 0.1396 | 0.0069 | 0.0208 | 0.0006 | 200   | 119 | 133 | 6 | 133 | 4 | 99 |
| 7  | 55.8  | 3466.5 | 77.6  | 0.02 | 0.0482 | 0.0021 | 0.1415 | 0.0061 | 0.0212 | 0.0006 | 109   | 102 | 134 | 5 | 135 | 4 | 99 |
| 8  | 138.7 | 5139.9 | 122.9 | 0.03 | 0.0530 | 0.0022 | 0.1627 | 0.0069 | 0.0222 | 0.0006 | 328   | 96  | 153 | 6 | 141 | 4 | 92 |
| 9  | 153.2 | 2300.4 | 50.7  | 0.07 | 0.0489 | 0.0022 | 0.1377 | 0.0063 | 0.0205 | 0.0006 | 143   | 114 | 131 | 6 | 131 | 4 | 99 |
| 10 | 133.0 | 3339.4 | 75.6  | 0.04 | 0.0480 | 0.0022 | 0.1404 | 0.0067 | 0.0212 | 0.0006 | 98    | 107 | 133 | 6 | 135 | 4 | 98 |
| 11 | 187.4 | 2558.8 | 57.7  | 0.07 | 0.0508 | 0.0024 | 0.1470 | 0.0072 | 0.0210 | 0.0006 | 228   | 114 | 139 | 6 | 134 | 4 | 96 |
| 12 | 70.6  | 2273.7 | 49.3  | 0.03 | 0.0482 | 0.0022 | 0.1335 | 0.0060 | 0.0201 | 0.0006 | 106   | 104 | 127 | 5 | 128 | 4 | 99 |
| 13 | 102.0 | 3172.6 | 77.2  | 0.03 | 0.0501 | 0.0022 | 0.1547 | 0.0067 | 0.0222 | 0.0006 | 198   | 99  | 146 | 6 | 141 | 4 | 96 |
| 14 | 63.2  | 4058.8 | 97.0  | 0.02 | 0.0492 | 0.0020 | 0.1516 | 0.0061 | 0.0224 | 0.0006 | 167   | 94  | 143 | 5 | 143 | 4 | 99 |
| 15 | 213.1 | 4299.1 | 105.4 | 0.05 | 0.0503 | 0.0022 | 0.1576 | 0.0068 | 0.0227 | 0.0007 | 206   | 102 | 149 | 6 | 144 | 4 | 97 |
| 16 | 78.8  | 5277.1 | 110.7 | 0.01 | 0.0467 | 0.0020 | 0.1430 | 0.0073 | 0.0220 | 0.0008 | 35    | 165 | 136 | 7 | 141 | 5 | 96 |
| 17 | 91.2  | 3878.6 | 91.7  | 0.02 | 0.0479 | 0.0022 | 0.1463 | 0.0068 | 0.0221 | 0.0007 | 95    | 117 | 139 | 6 | 141 | 4 | 98 |
| 18 | 40.3  | 3735.0 | 86.0  | 0.01 | 0.0493 | 0.0021 | 0.1445 | 0.0064 | 0.0212 | 0.0006 | 161   | 102 | 137 | 6 | 135 | 4 | 98 |
| 19 | 78.1  | 4019.9 | 89.5  | 0.02 | 0.0487 | 0.0021 | 0.1431 | 0.0062 | 0.0213 | 0.0006 | 132   | 102 | 136 | 6 | 136 | 4 | 99 |
| 20 | 130.2 | 4282.0 | 99.9  | 0.03 | 0.0474 | 0.0020 | 0.1439 | 0.0060 | 0.0219 | 0.0006 | 78    | 87  | 136 | 5 | 140 | 4 | 97 |
| 21 | 212.7 | 6638.7 | 161.7 | 0.03 | 0.0470 | 0.0020 | 0.1457 | 0.0059 | 0.0224 | 0.0006 | 56    | 91  | 138 | 5 | 143 | 4 | 96 |
| 22 | 121.0 | 4498.0 | 107.2 | 0.03 | 0.0471 | 0.0020 | 0.1458 | 0.0062 | 0.0223 | 0.0006 | 58    | 96  | 138 | 6 | 142 | 4 | 97 |
| 23 | 112.9 | 4835.2 | 112.2 | 0.02 | 0.0491 | 0.0019 | 0.1492 | 0.0059 | 0.0220 | 0.0006 | 154   | 91  | 141 | 5 | 140 | 4 | 99 |

---

NS-17 Core

---

|   |       |        |       |      |        |        |        |        |        |        |     |     |     |   |     |   |    |
|---|-------|--------|-------|------|--------|--------|--------|--------|--------|--------|-----|-----|-----|---|-----|---|----|
| 1 | 604.9 | 4080.8 | 108.0 | 0.15 | 0.0490 | 0.0022 | 0.1646 | 0.0073 | 0.0242 | 0.0008 | 146 | 108 | 155 | 6 | 154 | 5 | 99 |
| 2 | 148.9 | 5819.0 | 151.7 | 0.03 | 0.0552 | 0.0023 | 0.1834 | 0.0077 | 0.0240 | 0.0007 | 420 | 93  | 171 | 7 | 153 | 4 | 88 |
| 3 | 472.9 | 3969.5 | 107.2 | 0.12 | 0.0590 | 0.0025 | 0.1975 | 0.0089 | 0.0242 | 0.0007 | 569 | 93  | 183 | 8 | 154 | 4 | 82 |

|                                       |       |         |       |      |        |        |        |        |        |        |      |     |      |    |      |    |    |
|---------------------------------------|-------|---------|-------|------|--------|--------|--------|--------|--------|--------|------|-----|------|----|------|----|----|
| 4                                     | 719.8 | 12931.9 | 375.4 | 0.06 | 0.0518 | 0.0021 | 0.1953 | 0.0087 | 0.0275 | 0.0010 | 276  | 88  | 181  | 7  | 175  | 6  | 96 |
| 5                                     | 305.7 | 4780.7  | 127.2 | 0.06 | 0.0599 | 0.0026 | 0.1939 | 0.0085 | 0.0233 | 0.0007 | 598  | 99  | 180  | 7  | 148  | 4  | 80 |
| 6                                     | 253.3 | 4855.6  | 116.4 | 0.05 | 0.0494 | 0.0022 | 0.1574 | 0.0079 | 0.0228 | 0.0008 | 165  | 104 | 148  | 7  | 146  | 5  | 98 |
| 7                                     | 83.3  | 3626.0  | 89.8  | 0.02 | 0.0487 | 0.0021 | 0.1561 | 0.0069 | 0.0232 | 0.0007 | 132  | 97  | 147  | 6  | 148  | 4  | 99 |
| NS-16 (116°00'58.89"E, 29°26'58.06"N) |       |         |       |      |        |        |        |        |        |        |      |     |      |    |      |    |    |
| 1                                     | 84.9  | 4311.5  | 97.7  | 0.02 | 0.0523 | 0.0021 | 0.1566 | 0.0064 | 0.0215 | 0.0006 | 298  | 90  | 148  | 6  | 137  | 4  | 92 |
| 2                                     | 44.6  | 3312.6  | 73.6  | 0.01 | 0.0497 | 0.0024 | 0.1486 | 0.0071 | 0.0214 | 0.0006 | 189  | 118 | 141  | 6  | 136  | 4  | 96 |
| 3                                     | 51.0  | 3560.4  | 83.3  | 0.01 | 0.0485 | 0.0021 | 0.1512 | 0.0067 | 0.0224 | 0.0006 | 124  | 110 | 143  | 6  | 143  | 4  | 99 |
| 4                                     | 33.8  | 4415.0  | 100.4 | 0.01 | 0.0495 | 0.0022 | 0.1530 | 0.0067 | 0.0221 | 0.0006 | 172  | 104 | 145  | 6  | 141  | 4  | 97 |
| 5                                     | 104.8 | 4854.1  | 108.3 | 0.02 | 0.0515 | 0.0024 | 0.1525 | 0.0074 | 0.0213 | 0.0006 | 265  | 107 | 144  | 7  | 136  | 4  | 94 |
| 6                                     | 213.2 | 7175.0  | 216.8 | 0.03 | 0.0481 | 0.0021 | 0.1850 | 0.0093 | 0.0279 | 0.0011 | 106  | 100 | 172  | 8  | 177  | 7  | 97 |
| 7                                     | 119.9 | 293.1   | 42.0  | 0.41 | 0.0715 | 0.0040 | 1.2029 | 0.0704 | 0.1213 | 0.0037 | 972  | 114 | 802  | 32 | 738  | 21 | 91 |
| 8                                     | 74.8  | 3968.4  | 89.4  | 0.02 | 0.0521 | 0.0021 | 0.1552 | 0.0064 | 0.0214 | 0.0006 | 300  | 97  | 147  | 6  | 137  | 4  | 92 |
| 9                                     | 102.8 | 4769.6  | 108.1 | 0.02 | 0.0465 | 0.0021 | 0.1384 | 0.0061 | 0.0215 | 0.0006 | 33   | 94  | 132  | 5  | 137  | 4  | 96 |
| 10                                    | 92.2  | 5629.5  | 126.8 | 0.02 | 0.0502 | 0.0022 | 0.1519 | 0.0068 | 0.0218 | 0.0006 | 211  | 106 | 144  | 6  | 139  | 4  | 96 |
| 11                                    | 66.1  | 4949.9  | 112.2 | 0.01 | 0.0485 | 0.0021 | 0.1485 | 0.0063 | 0.0219 | 0.0006 | 120  | 102 | 141  | 6  | 139  | 4  | 99 |
| 12                                    | 38.5  | 4584.5  | 106.1 | 0.01 | 0.0464 | 0.0022 | 0.1413 | 0.0069 | 0.0219 | 0.0006 | 20   | 111 | 134  | 6  | 140  | 4  | 96 |
| 13                                    | 219.0 | 180.9   | 79.5  | 1.21 | 0.1299 | 0.0054 | 5.2941 | 0.2280 | 0.2942 | 0.0088 | 2098 | 67  | 1868 | 37 | 1663 | 44 | 88 |
| 14                                    | 87.2  | 4577.1  | 102.1 | 0.02 | 0.0510 | 0.0024 | 0.1540 | 0.0075 | 0.0217 | 0.0006 | 243  | 111 | 145  | 7  | 138  | 4  | 94 |
| 15                                    | 48.7  | 3767.1  | 86.8  | 0.01 | 0.0486 | 0.0021 | 0.1468 | 0.0062 | 0.0217 | 0.0006 | 128  | 97  | 139  | 6  | 138  | 4  | 99 |
| 16                                    | 82.2  | 3458.4  | 77.6  | 0.02 | 0.0499 | 0.0022 | 0.1506 | 0.0068 | 0.0217 | 0.0006 | 191  | 106 | 142  | 6  | 138  | 4  | 97 |
| 17                                    | 43.1  | 4035.7  | 91.8  | 0.01 | 0.0482 | 0.0021 | 0.1455 | 0.0063 | 0.0217 | 0.0006 | 109  | 102 | 138  | 6  | 139  | 4  | 99 |
| 18                                    | 98.6  | 4370.0  | 99.6  | 0.02 | 0.0486 | 0.0022 | 0.1473 | 0.0066 | 0.0218 | 0.0006 | 132  | 106 | 140  | 6  | 139  | 4  | 99 |
| 19                                    | 192.0 | 4632.7  | 108.0 | 0.04 | 0.0493 | 0.0020 | 0.1500 | 0.0060 | 0.0218 | 0.0006 | 167  | 94  | 142  | 5  | 139  | 4  | 98 |
| 20                                    | 61.1  | 4509.8  | 103.2 | 0.01 | 0.0472 | 0.0019 | 0.1432 | 0.0058 | 0.0218 | 0.0006 | 61   | 93  | 136  | 5  | 139  | 4  | 97 |
| 21                                    | 64.7  | 5120.1  | 117.2 | 0.01 | 0.0478 | 0.0020 | 0.1429 | 0.0059 | 0.0215 | 0.0006 | 100  | 87  | 136  | 5  | 137  | 4  | 98 |

|                                        |       |        |       |      |        |        |        |        |        |        |     |     |     |    |     |    |    |
|----------------------------------------|-------|--------|-------|------|--------|--------|--------|--------|--------|--------|-----|-----|-----|----|-----|----|----|
| 22                                     | 75.5  | 5166.8 | 113.3 | 0.01 | 0.0503 | 0.0021 | 0.1490 | 0.0063 | 0.0213 | 0.0006 | 206 | 98  | 141 | 6  | 136 | 4  | 96 |
| 23                                     | 69.4  | 3995.6 | 88.8  | 0.02 | 0.0495 | 0.0024 | 0.1469 | 0.0070 | 0.0213 | 0.0006 | 172 | 111 | 139 | 6  | 136 | 4  | 97 |
| 24                                     | 34.4  | 4315.0 | 99.3  | 0.01 | 0.0468 | 0.0020 | 0.1426 | 0.0060 | 0.0219 | 0.0006 | 39  | 161 | 135 | 5  | 140 | 4  | 96 |
| 25                                     | 91.3  | 4557.8 | 103.3 | 0.02 | 0.0498 | 0.0023 | 0.1523 | 0.0075 | 0.0219 | 0.0006 | 183 | 107 | 144 | 7  | 140 | 4  | 97 |
| 26                                     | 52.6  | 4101.2 | 94.6  | 0.01 | 0.0482 | 0.0020 | 0.1476 | 0.0061 | 0.0219 | 0.0006 | 109 | 98  | 140 | 5  | 140 | 4  | 99 |
| 27                                     | 38.7  | 4244.0 | 99.5  | 0.01 | 0.0468 | 0.0021 | 0.1433 | 0.0061 | 0.0221 | 0.0006 | 39  | 100 | 136 | 5  | 141 | 4  | 96 |
| 28                                     | 102.1 | 4610.4 | 107.4 | 0.02 | 0.0479 | 0.0019 | 0.1467 | 0.0060 | 0.0221 | 0.0006 | 100 | 83  | 139 | 5  | 141 | 4  | 98 |
| 29                                     | 85.6  | 370.0  | 57.5  | 0.23 | 0.0717 | 0.0033 | 1.3494 | 0.0636 | 0.1360 | 0.0039 | 977 | 127 | 867 | 27 | 822 | 22 | 94 |
| 30                                     | 214.5 | 466.7  | 75.2  | 0.46 | 0.0681 | 0.0032 | 1.2870 | 0.0597 | 0.1353 | 0.0039 | 872 | 98  | 840 | 27 | 818 | 22 | 97 |
| 31                                     | 47.1  | 4891.4 | 111.9 | 0.01 | 0.0488 | 0.0021 | 0.1502 | 0.0065 | 0.0221 | 0.0006 | 200 | 100 | 142 | 6  | 141 | 4  | 99 |
| 32                                     | 292.9 | 5063.0 | 116.4 | 0.06 | 0.0527 | 0.0027 | 0.1627 | 0.0081 | 0.0221 | 0.0007 | 317 | 115 | 153 | 7  | 141 | 4  | 91 |
| 33                                     | 54.7  | 4559.5 | 104.9 | 0.01 | 0.0511 | 0.0022 | 0.1581 | 0.0067 | 0.0222 | 0.0006 | 243 | 98  | 149 | 6  | 142 | 4  | 94 |
| 34                                     | 27.4  | 4029.2 | 92.3  | 0.01 | 0.0494 | 0.0021 | 0.1530 | 0.0064 | 0.0223 | 0.0006 | 169 | 98  | 145 | 6  | 142 | 4  | 98 |
| 35                                     | 66.2  | 5608.9 | 130.8 | 0.01 | 0.0483 | 0.0020 | 0.1499 | 0.0062 | 0.0223 | 0.0006 | 122 | 96  | 142 | 5  | 142 | 4  | 99 |
| 36                                     | 239.4 | 5035.3 | 119.4 | 0.05 | 0.0487 | 0.0021 | 0.1510 | 0.0068 | 0.0223 | 0.0006 | 132 | 101 | 143 | 6  | 142 | 4  | 99 |
| 37                                     | 41.9  | 4548.3 | 105.1 | 0.01 | 0.0487 | 0.0021 | 0.1517 | 0.0067 | 0.0224 | 0.0006 | 132 | 99  | 143 | 6  | 143 | 4  | 99 |
| 38                                     | 516.0 | 3665.1 | 85.8  | 0.14 | 0.0503 | 0.0022 | 0.1493 | 0.0066 | 0.0213 | 0.0006 | 209 | 102 | 141 | 6  | 136 | 4  | 95 |
| 39                                     | 89.8  | 4344.1 | 95.9  | 0.02 | 0.0502 | 0.0022 | 0.1496 | 0.0064 | 0.0213 | 0.0006 | 206 | 100 | 142 | 6  | 136 | 4  | 95 |
| 40                                     | 51.7  | 3160.2 | 74.3  | 0.02 | 0.0472 | 0.0023 | 0.1445 | 0.0071 | 0.0221 | 0.0006 | 61  | 111 | 137 | 6  | 141 | 4  | 97 |
| 41                                     | 52.1  | 2778.2 | 61.7  | 0.02 | 0.0517 | 0.0024 | 0.1532 | 0.0073 | 0.0213 | 0.0006 | 333 | 105 | 145 | 6  | 136 | 4  | 93 |
| 42                                     | 75.2  | 3762.8 | 85.5  | 0.02 | 0.0482 | 0.0019 | 0.1445 | 0.0059 | 0.0216 | 0.0006 | 109 | 99  | 137 | 5  | 138 | 4  | 99 |
| 43                                     | 52.5  | 5652.0 | 125.2 | 0.01 | 0.0499 | 0.0022 | 0.1495 | 0.0066 | 0.0216 | 0.0006 | 191 | 108 | 141 | 6  | 138 | 4  | 97 |
| LS23-1 (116°03'22.20"E, 29°32'04.56"N) |       |        |       |      |        |        |        |        |        |        |     |     |     |    |     |    |    |
| 1                                      | 245.7 | 359.4  | 9.3   | 0.68 | 0.0515 | 0.0029 | 0.1428 | 0.0086 | 0.0203 | 0.0006 | 263 | 87  | 136 | 8  | 129 | 4  | 95 |
| 2                                      | 236.4 | 292.4  | 7.7   | 0.81 | 0.0483 | 0.0031 | 0.1354 | 0.0092 | 0.0205 | 0.0006 | 111 | 99  | 129 | 8  | 131 | 4  | 98 |
| 3                                      | 988.6 | 628.0  | 19.5  | 1.57 | 0.0503 | 0.0021 | 0.1383 | 0.0067 | 0.0199 | 0.0005 | 210 | 64  | 132 | 6  | 127 | 3  | 96 |

|    |        |        |      |      |        |        |        |        |        |        |     |     |     |    |     |   |    |
|----|--------|--------|------|------|--------|--------|--------|--------|--------|--------|-----|-----|-----|----|-----|---|----|
| 4  | 393.2  | 483.6  | 12.5 | 0.81 | 0.0510 | 0.0023 | 0.1398 | 0.0072 | 0.0199 | 0.0005 | 241 | 69  | 133 | 6  | 127 | 3 | 95 |
| 5  | 626.7  | 509.4  | 14.6 | 1.23 | 0.0533 | 0.0028 | 0.1485 | 0.0081 | 0.0202 | 0.0006 | 342 | 75  | 141 | 7  | 129 | 3 | 91 |
| 6  | 316.6  | 399.4  | 10.1 | 0.79 | 0.0499 | 0.0031 | 0.1336 | 0.0085 | 0.0197 | 0.0006 | 190 | 94  | 127 | 8  | 126 | 4 | 98 |
| 7  | 417.3  | 365.7  | 10.2 | 1.14 | 0.0442 | 0.0022 | 0.1210 | 0.0068 | 0.0200 | 0.0006 | -63 | 71  | 116 | 6  | 128 | 3 | 90 |
| 8  | 371.7  | 454.7  | 11.9 | 0.82 | 0.0503 | 0.0026 | 0.1382 | 0.0078 | 0.0200 | 0.0005 | 207 | 81  | 131 | 7  | 128 | 3 | 97 |
| 9  | 668.4  | 468.6  | 14.1 | 1.43 | 0.0532 | 0.0026 | 0.1462 | 0.0080 | 0.0201 | 0.0006 | 338 | 75  | 139 | 7  | 128 | 3 | 92 |
| 10 | 602.6  | 528.5  | 15.7 | 1.14 | 0.0461 | 0.0040 | 0.1256 | 0.0104 | 0.0198 | 0.0005 |     | 192 | 120 | 9  | 126 | 3 | 92 |
| 11 | 194.0  | 150.3  | 4.4  | 1.29 | 0.0553 | 0.0036 | 0.1483 | 0.0101 | 0.0200 | 0.0007 | 426 | 95  | 140 | 9  | 127 | 4 | 90 |
| 12 | 268.3  | 460.2  | 11.5 | 0.58 | 0.0476 | 0.0039 | 0.1351 | 0.0104 | 0.0206 | 0.0006 | 81  | 183 | 129 | 9  | 131 | 4 | 92 |
| 13 | 183.2  | 170.0  | 5.1  | 1.08 | 0.0575 | 0.0039 | 0.1668 | 0.0115 | 0.0215 | 0.0006 | 511 | 101 | 157 | 10 | 137 | 4 | 86 |
| 14 | 455.7  | 522.6  | 15.2 | 0.87 | 0.0480 | 0.0024 | 0.1419 | 0.0076 | 0.0217 | 0.0006 | 100 | 71  | 135 | 7  | 138 | 4 | 97 |
| 15 | 715.7  | 860.5  | 24.2 | 0.83 | 0.0551 | 0.0024 | 0.1555 | 0.0072 | 0.0206 | 0.0006 | 417 | 57  | 147 | 6  | 132 | 3 | 89 |
| 16 | 365.9  | 423.9  | 11.7 | 0.86 | 0.0544 | 0.0029 | 0.1538 | 0.0087 | 0.0207 | 0.0006 | 387 | 78  | 145 | 8  | 132 | 4 | 90 |
| 17 | 289.8  | 249.7  | 6.9  | 1.16 | 0.0506 | 0.0032 | 0.1364 | 0.0090 | 0.0198 | 0.0006 | 223 | 97  | 130 | 8  | 126 | 4 | 97 |
| 18 | 173.4  | 353.8  | 10.2 | 0.49 | 0.0461 | 0.0036 | 0.1275 | 0.0092 | 0.0201 | 0.0005 |     | 171 | 122 | 8  | 128 | 3 | 80 |
| 19 | 175.6  | 267.7  | 7.0  | 0.66 | 0.0472 | 0.0033 | 0.1349 | 0.0095 | 0.0207 | 0.0006 | 60  | 101 | 128 | 8  | 132 | 4 | 97 |
| 20 | 1342.1 | 1226.1 | 36.5 | 1.09 | 0.0494 | 0.0018 | 0.1425 | 0.0063 | 0.0209 | 0.0006 | 164 | 55  | 135 | 6  | 133 | 3 | 98 |
| 21 | 270.0  | 347.9  | 9.3  | 0.78 | 0.0492 | 0.0027 | 0.1435 | 0.0086 | 0.0213 | 0.0006 | 155 | 84  | 136 | 8  | 136 | 4 | 99 |
| 22 | 195.8  | 191.8  | 6.8  | 1.02 | 0.0461 | 0.0050 | 0.1255 | 0.0133 | 0.0198 | 0.0005 |     | 221 | 120 | 12 | 126 | 3 | 75 |
| 23 | 222.7  | 407.7  | 11.7 | 0.55 | 0.0494 | 0.0024 | 0.1660 | 0.0092 | 0.0242 | 0.0007 | 166 | 75  | 156 | 8  | 154 | 5 | 99 |
| 24 | 580.7  | 748.6  | 20.3 | 0.78 | 0.0504 | 0.0053 | 0.1438 | 0.0144 | 0.0207 | 0.0006 | 215 | 238 | 136 | 13 | 132 | 4 | 82 |
| 25 | 186.0  | 294.9  | 8.2  | 0.63 | 0.0540 | 0.0031 | 0.1626 | 0.0099 | 0.0221 | 0.0006 | 372 | 87  | 153 | 9  | 141 | 4 | 91 |
| 26 | 202.8  | 258.5  | 7.5  | 0.78 | 0.0508 | 0.0031 | 0.1537 | 0.0098 | 0.0223 | 0.0006 | 231 | 95  | 145 | 9  | 142 | 4 | 97 |
| 27 | 327.0  | 426.0  | 13.4 | 0.77 | 0.0546 | 0.0075 | 0.1620 | 0.0219 | 0.0215 | 0.0006 | 394 | 312 | 152 | 19 | 137 | 4 | 72 |
| 28 | 156.1  | 177.7  | 5.4  | 0.88 | 0.0488 | 0.0060 | 0.1409 | 0.0167 | 0.0210 | 0.0006 | 137 | 260 | 134 | 15 | 134 | 4 | 70 |
| 29 | 407.8  | 447.0  | 12.6 | 0.91 | 0.0498 | 0.0024 | 0.1406 | 0.0072 | 0.0206 | 0.0006 | 187 | 70  | 134 | 6  | 131 | 4 | 98 |



|    |       |       |      |      |        |        |        |        |        |        |  |     |     |    |     |   |    |
|----|-------|-------|------|------|--------|--------|--------|--------|--------|--------|--|-----|-----|----|-----|---|----|
| 30 | 117.0 | 173.1 | 10.2 | 0.68 | 0.0461 | 0.0121 | 0.1504 | 0.0389 | 0.0237 | 0.0010 |  | 428 | 142 | 34 | 151 | 6 | 69 |
|----|-------|-------|------|------|--------|--------|--------|--------|--------|--------|--|-----|-----|----|-----|---|----|

---
